# Supplementary material
Source: Springer Nature journal article supplement (https://www.springermedizin.de/resource/supplementary/12886_2010_196_MOESM10_ESM.pdf/9473624)

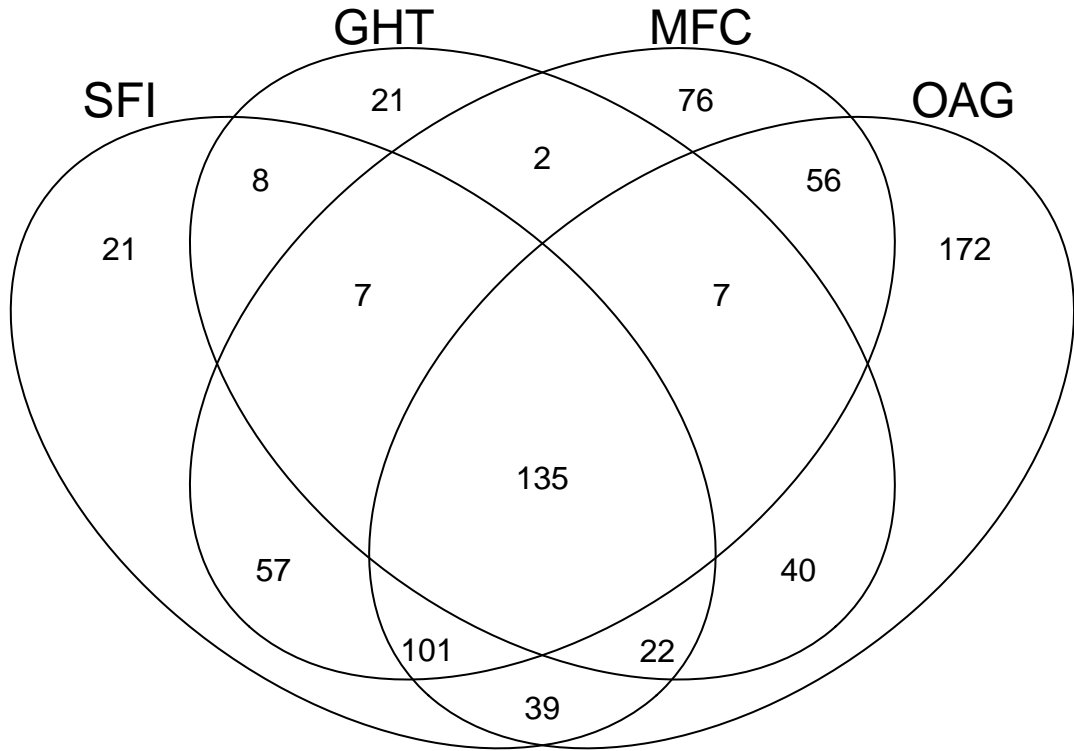

Supplement: MOESM10 [file 9473624]
